# Supplementary material for: Infrared photodissociation spectroscopic investigation on VO+ and NbO+ hydrolysis catalyzed by water molecules
Source: Royal Society of Chemistry journal article supplement (doi:10.1039/d0cp04448b), 2020-11-26
Supplement: d0cp04448b1.pdf [file d0cp04448b1.pdf]

## Supporting Information

### Infrared photodissociation spectroscopic investigation on $\text{VO}^+$ and $\text{NbO}^+$ hydrolysis Catalyzed by Water Molecules

Ke Xin<sup>a</sup>, Yinjuan Chen<sup>a</sup>, Luning Zhang<sup>a</sup>, Bing Xu<sup>a</sup>, Xuefeng Wang<sup>a,\*</sup>, Guanjun Wang<sup>b,\*</sup>

<sup>a</sup> School of Chemical Science and Engineering, Shanghai Key Lab of Chemical Assessment and Sustainability Tongji University, 1239 Siping Road, Shanghai, 200092, China

<sup>b</sup> Department of Chemistry, Shanghai Key Laboratory of Molecular Catalysts and Innovative Materials, Fudan University, Shanghai, 200433, China

The Supporting Information includes 14 pages with 27 figures.

#### Content

##### $\text{VO}(\text{H}_2\text{O})_n\text{Ar}^+$

|                                                                                                                                                      |    |
|------------------------------------------------------------------------------------------------------------------------------------------------------|----|
| Fig. S1. Geometries of the low-energy isomers of $\text{VO}(\text{H}_2\text{O})^+$ .                                                                 | S1 |
| Fig. S2. Geometries of the low-energy isomers of $\text{VO}(\text{H}_2\text{O})_2^+$ .                                                               | S1 |
| Fig. S3. Geometries of the low-energy isomers of $\text{VO}(\text{H}_2\text{O})\text{Ar}^+$ .                                                        | S1 |
| Fig. S4. Geometries of the low-energy isomers of $\text{VO}(\text{H}_2\text{O})_2\text{Ar}^+$ .                                                      | S1 |
| Fig. S5. Geometries of the low-energy isomers of $\text{VO}(\text{H}_2\text{O})\text{Ar}_2^+$ .                                                      | S2 |
| Fig. S6. The experimental (Exp.) and simulated vibrational spectra of $\text{VO}(\text{H}_2\text{O})\text{Ar}^+$ .                                   | S2 |
| Fig. S7. The experimental (Exp.) and simulated vibrational spectra of $\text{VO}(\text{H}_2\text{O})_2\text{Ar}^+$ .                                 | S3 |
| Fig. S8. The experimental (Exp.) and simulated vibrational spectra of $\text{VO}(\text{H}_2\text{O})\text{Ar}_2^+$ .                                 | S4 |
| Fig. S9. The experimental (Exp.) and simulated anharmonic / harmonic vibrational spectra of $\text{VO}(\text{H}_2\text{O})_2\text{Ar}^+$ .           | S4 |
| Fig. S10. Potential energy surfaces for the reactions of $\text{VO}^+ + \text{H}_2\text{O} \rightarrow \text{VO}(\text{H}_2\text{O})^+$              | S5 |
| Fig. S11. Potential energy surfaces for the reactions of $\text{VO}^+ + 2\text{H}_2\text{O} \rightarrow \text{V}(\text{OH})_2(\text{H}_2\text{O})^+$ | S5 |

##### $\text{NbO}(\text{H}_2\text{O})_n\text{Ar}^+$

|                                                                                                                        |     |
|------------------------------------------------------------------------------------------------------------------------|-----|
| Fig. S12. Geometries of the low-energy isomers of $\text{NbO}(\text{H}_2\text{O})^+$ .                                 | S6  |
| Fig. S13. Geometries of the low-energy isomers of $\text{NbO}(\text{H}_2\text{O})_2^+$ .                               | S6  |
| Fig. S14. Geometries of the low-energy isomers of $\text{NbO}(\text{H}_2\text{O})\text{Ar}^+$ .                        | S6  |
| Fig. S15. Geometries of the low-energy isomers of $\text{NbO}(\text{H}_2\text{O})_2\text{Ar}^+$ .                      | S6  |
| Fig. S16. Geometries of the low-energy isomers of $\text{NbO}(\text{H}_2\text{O})\text{Ar}_2^+$ .                      | S7  |
| Fig. S17. Geometries of the low-energy isomers of $\text{NbO}(\text{H}_2\text{O})_2\text{Ar}_2^+$ .                    | S7  |
| Fig. S18. The experimental (Exp.) and simulated vibrational spectra of $\text{NbO}(\text{H}_2\text{O})\text{Ar}^+$ .   | S8  |
| Fig. S19. The experimental (Exp.) and simulated vibrational spectra of $\text{NbO}(\text{H}_2\text{O})_2\text{Ar}^+$ . | S9  |
| Fig. S20. The experimental (Exp.) and simulated vibrational spectra of $\text{NbO}(\text{H}_2\text{O})\text{Ar}_2^+$ . | S10 |

|                                                                                                                                              |     |
|----------------------------------------------------------------------------------------------------------------------------------------------|-----|
| Fig. S21. The experimental (Exp.) and simulated vibrational spectra of $\text{NbO}(\text{H}_2\text{O})_2\text{Ar}_2^+$ .                     | S11 |
| Fig. S22. The experimental (Exp.) and simulated anharmonic / harmonic vibrational spectra of $\text{NbO}(\text{H}_2\text{O})\text{Ar}^+$ .   | S11 |
| Fig. S23. The experimental (Exp.) and simulated anharmonic/harmonic vibrational spectra of $\text{NbO}(\text{H}_2\text{O})\text{Ar}_2^+$ .   | S12 |
| Fig. S24. The experimental (Exp.) and simulated anharmonic/harmonic vibrational spectra of $\text{NbO}(\text{H}_2\text{O})_2\text{Ar}^+$ .   | S12 |
| Fig. S25. The experimental (Exp.) and simulated anharmonic/harmonic vibrational spectra of $\text{NbO}(\text{H}_2\text{O})_2\text{Ar}_2^+$ . | S13 |
| Fig. S26. Potential energy surfaces for the reactions of $\text{NbO}^+ + \text{H}_2\text{O} \rightarrow \text{NbO}(\text{H}_2\text{O})^+$    | S13 |
| Fig. S27. Potential energy surfaces for the reactions of $\text{NbO}^+ + 2\text{H}_2\text{O} \rightarrow \text{HNb}(\text{OH})_3^+$          | S14 |

## VO(H<sub>2</sub>O)<sub>n</sub>Ar<sup>+</sup>

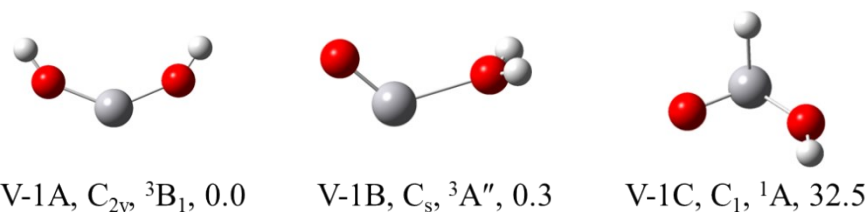

**Fig. S1.** Optimized structures of the minimum-energy isomers of VO(H<sub>2</sub>O)<sup>+</sup>. The relative energies (with ZPE correction) are given in kcal/mol.

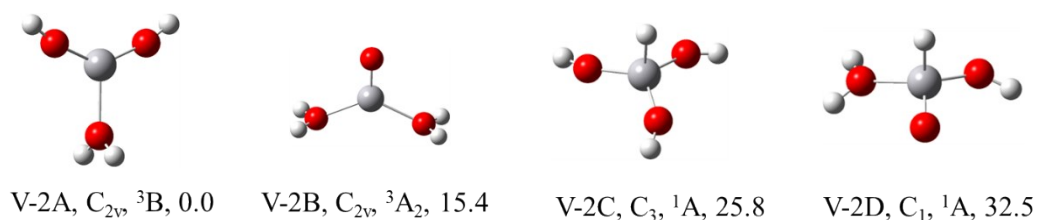

**Fig. S2.** Optimized structures of the minimum-energy isomers of VO(H<sub>2</sub>O)<sub>2</sub><sup>+</sup>. The relative energies (with ZPE correction) are given in kcal/mol.

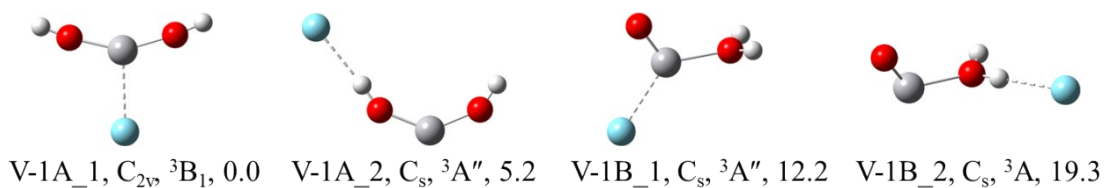

**Fig. S3.** Optimized structures of the minimum-energy isomers of VO(H<sub>2</sub>O)Ar<sup>+</sup>. The relative energies (with ZPE correction) are given in kcal/mol.

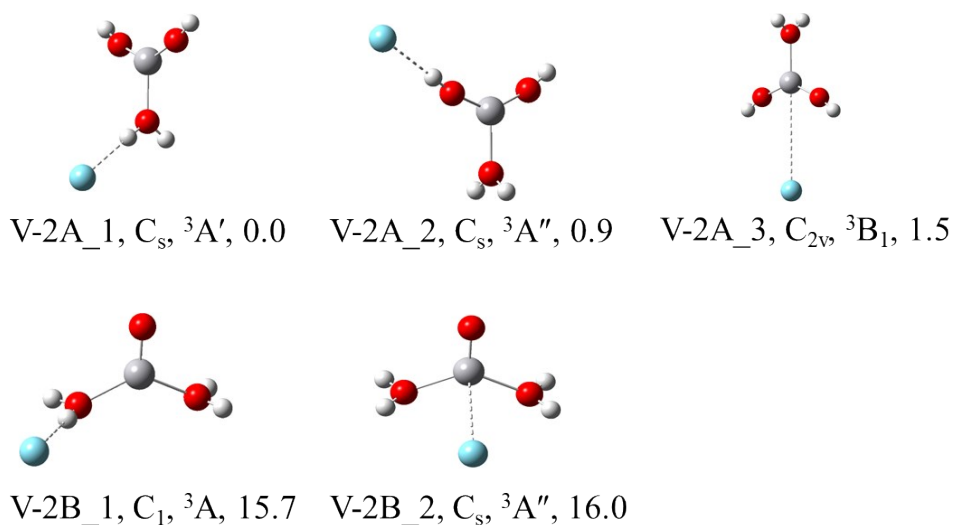

**Fig. S4.** Optimized structures of the minimum-energy isomers of VO(H<sub>2</sub>O)<sub>2</sub>Ar<sup>+</sup>. The relative energies (with ZPE correction) are given in kcal/mol.

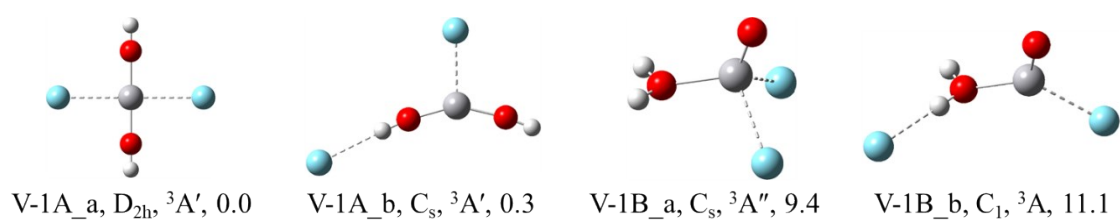

**Fig. S5.** Optimized structures of the minimum-energy isomers of  $VO(H_2O)Ar_2^+$ . The relative energies (with ZPE correction) are given in kcal/mol.

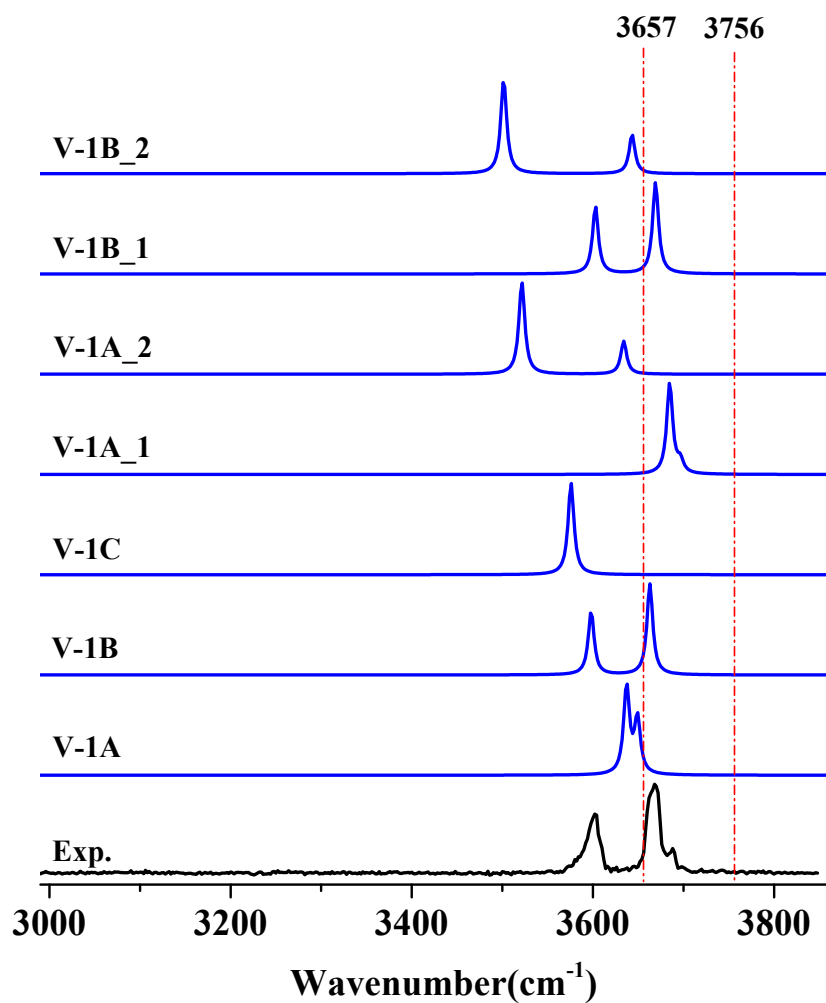

**Fig. S6.** Experimental infrared spectrum (black) and simulated vibrational spectra (blue) of  $VO(H_2O)Ar^+$  in O-H stretching frequency region. The two dashed red lines are corresponding to the symmetric ( $3657cm^{-1}$ ) and asymmetric ( $3756 cm^{-1}$ ) stretches of the isolated water molecule.

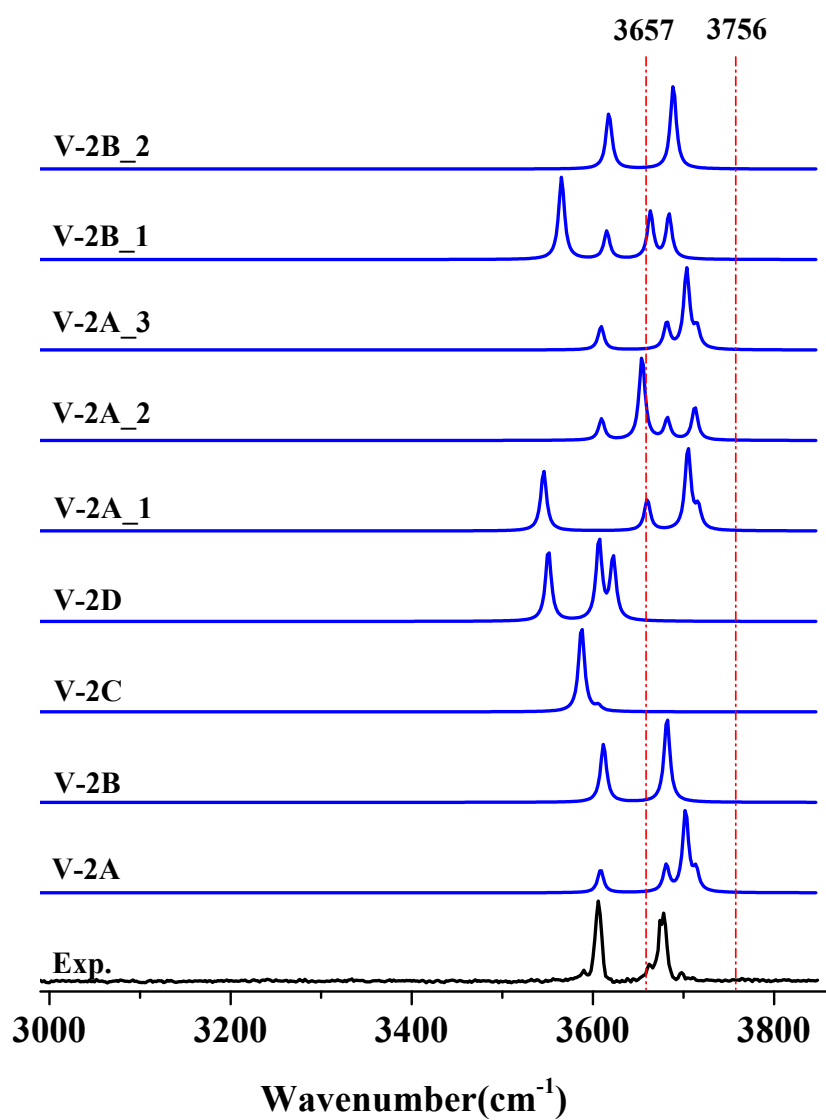

**Fig. S7.** Experimental infrared spectrum (black) and simulated vibrational spectra (blue) of  $\text{VO}(\text{H}_2\text{O})_2\text{Ar}^+$  in O-H stretching frequency region. The two dashed red lines are corresponding to the symmetric ( $3657\text{cm}^{-1}$ ) and asymmetric ( $3756\text{cm}^{-1}$ ) stretches of the isolated water molecule.

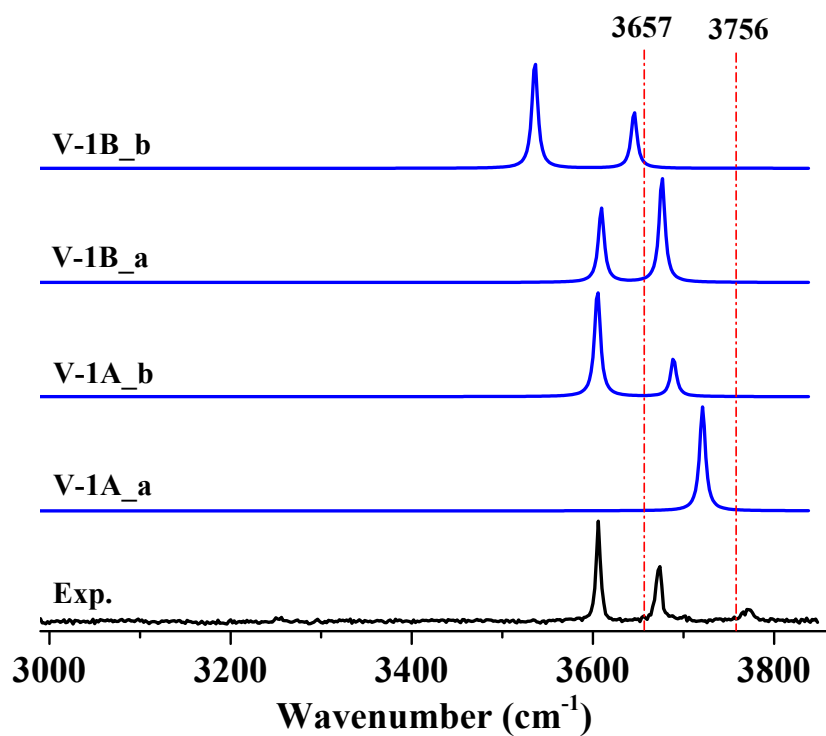

**Fig. S8.** Experimental infrared spectrum (black) and simulated vibrational spectra (blue) of  $\text{VO}(\text{H}_2\text{O})_2\text{Ar}_2^+$  in O-H stretching frequency region. The two dashed red lines are corresponding to the symmetric ( $3657\text{cm}^{-1}$ ) and asymmetric ( $3756\text{cm}^{-1}$ ) stretches of the isolated water molecule.

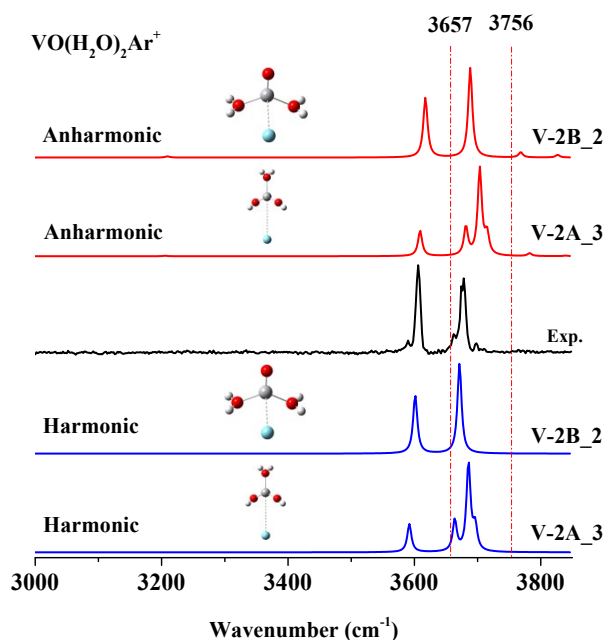

**Fig. S9.** Experimental infrared spectrum (black) of  $\text{VO}(\text{H}_2\text{O})_2\text{Ar}_2^+$ , calculated anharmonic vibrational spectrum (red) and harmonic vibrational spectrum (blue) of V-2A\_3 and V-2B\_2 in O-H stretching frequency region. The two dashed red lines are corresponding to the symmetric ( $3657\text{cm}^{-1}$ ) and asymmetric ( $3756\text{cm}^{-1}$ ) stretches of the isolated water molecule.

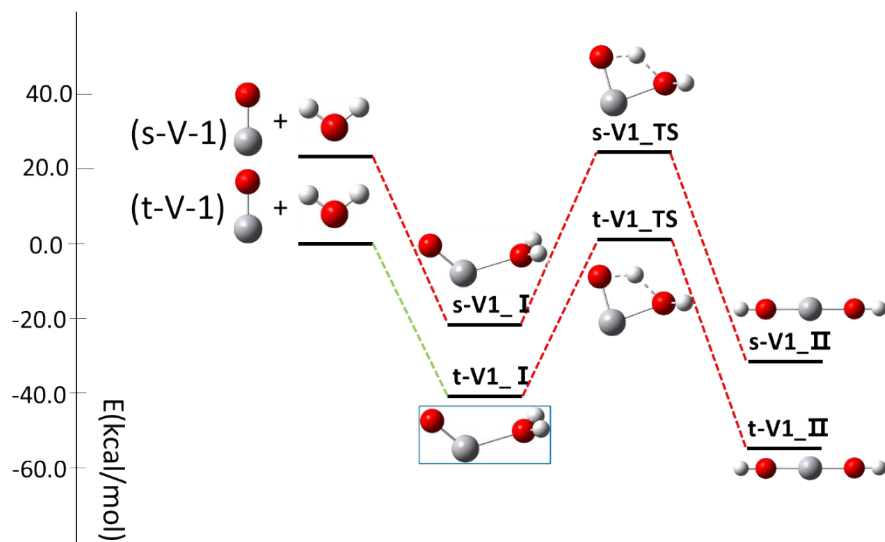

**Fig. S10.** Potential energy surfaces for the reactions of  $\text{VO}^+ + \text{H}_2\text{O} \rightarrow \text{VO}(\text{H}_2\text{O})^+$  (s-V-1: Singlet State; t-V-1: Triplet State).

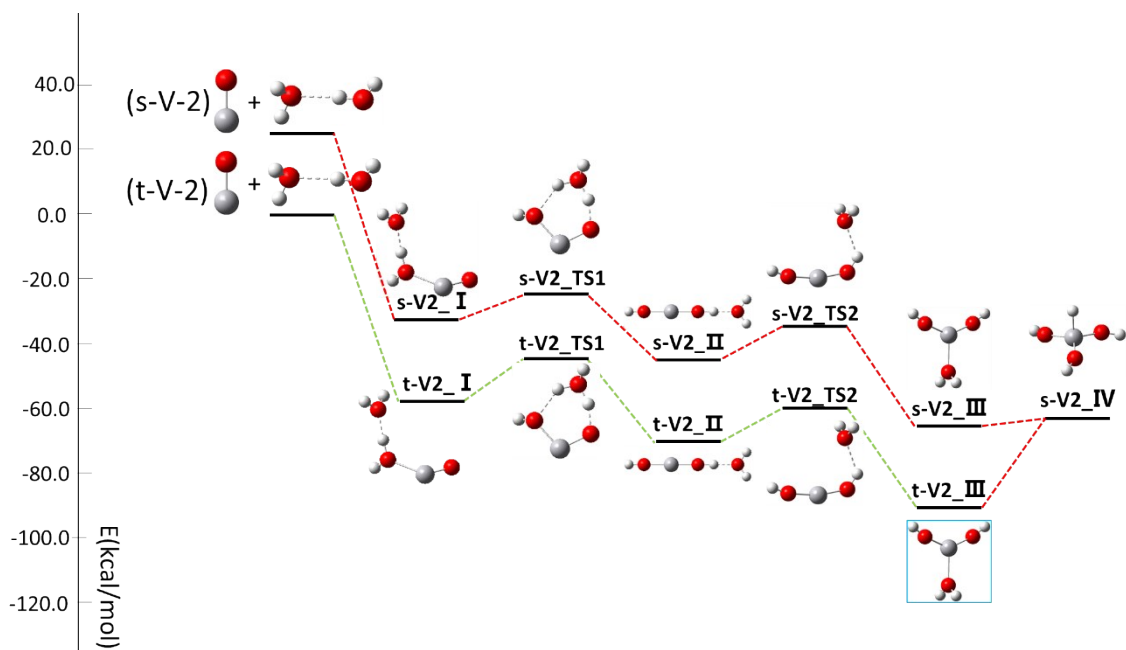

**Fig. S11.** Potential energy surfaces for the reactions of  $\text{VO}^+ + 2\text{H}_2\text{O} \rightarrow \text{V}(\text{OH})_2(\text{H}_2\text{O})^+$  (s-V-2: Singlet State; t-V-2: Triplet State).

## NbO(H<sub>2</sub>O)<sub>n</sub>Ar<sup>+</sup>

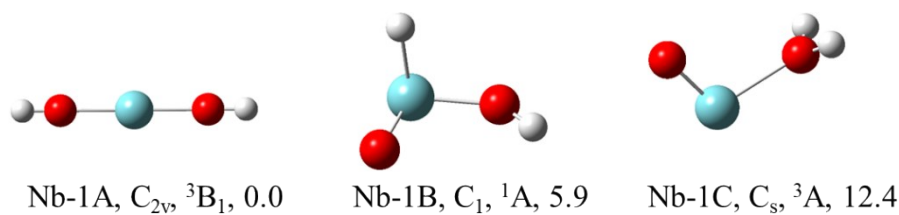

**Fig. S12.** Optimized structures of the minimum-energy isomers of NbO(H<sub>2</sub>O)<sup>+</sup>. The relative energies (with ZPE correction) are given in kcal/mol.

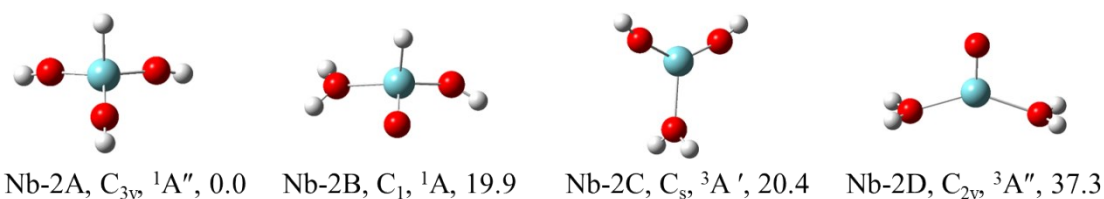

**Fig. S13.** Optimized structures of the minimum-energy isomers of NbO(H<sub>2</sub>O)<sub>2</sub><sup>+</sup>. The relative energies (with ZPE correction) are given in kcal/mol.

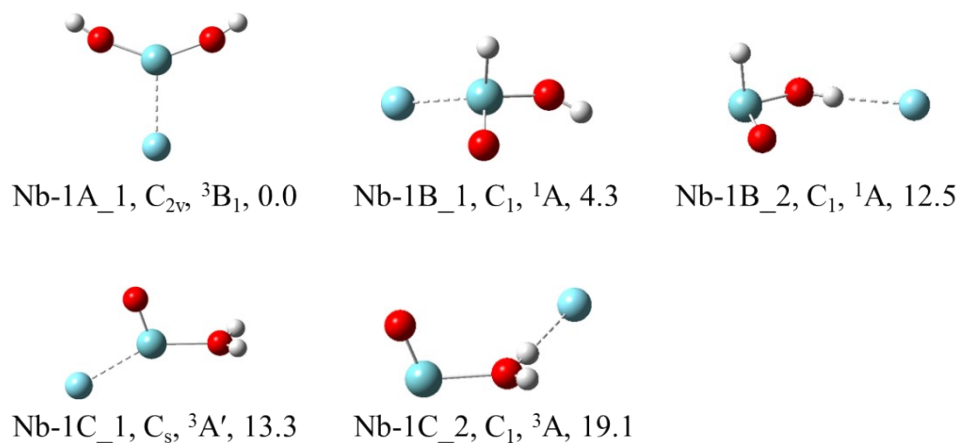

**Fig. S14.** Optimized structures of the minimum-energy isomers of NbO(H<sub>2</sub>O)Ar<sup>+</sup>. The relative energies (with ZPE correction) are given in kcal/mol.

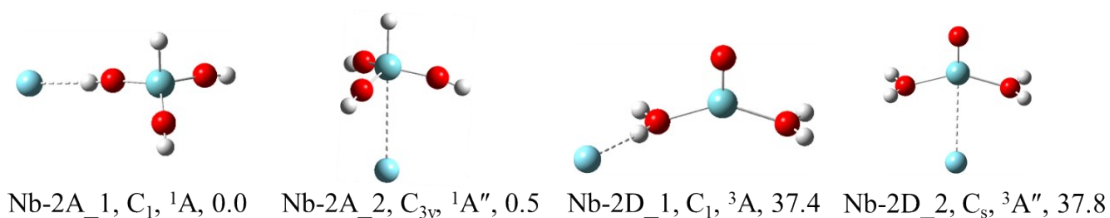

**Fig. S15.** Optimized structures of the minimum-energy isomers of NbO(H<sub>2</sub>O)<sub>2</sub>Ar<sup>+</sup>. The relative energies (with ZPE correction) are given in kcal/mol.



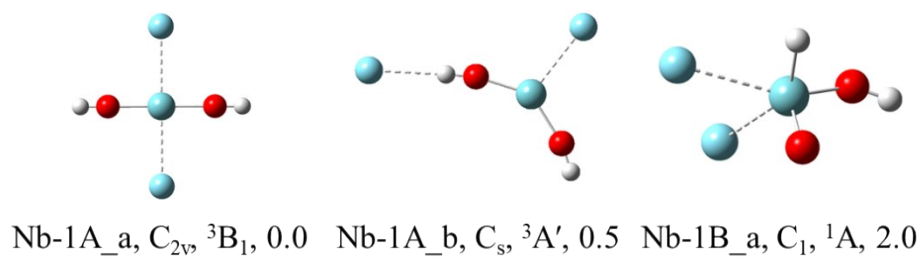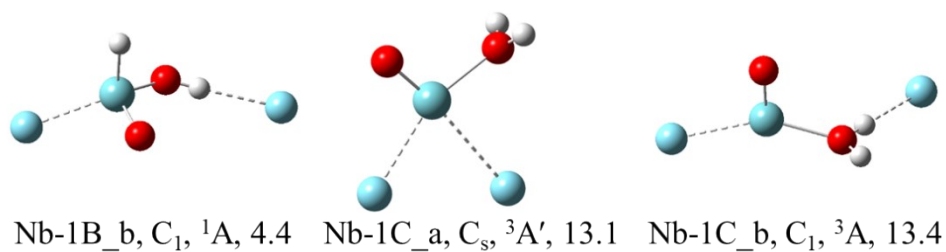

**Fig. S16.** Optimized structures of the minimum-energy isomers of  $NbO(H_2O)Ar_2^+$ . The relative energies (with ZPE correction) are given in kcal/mol.

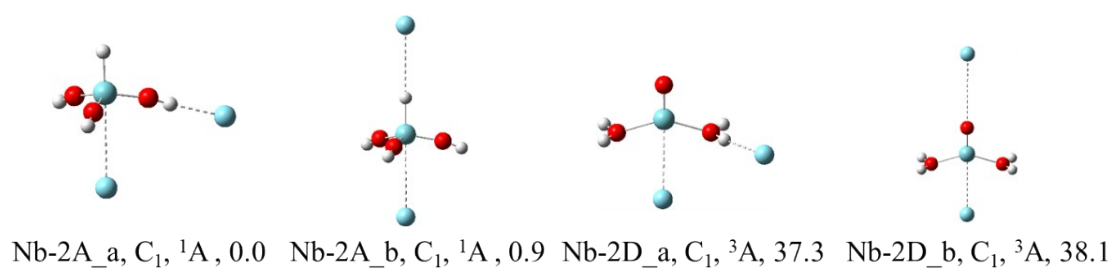

**Fig. S17.** Optimized structures of the minimum-energy isomers of  $NbO(H_2O)_2Ar_2^+$ . The relative energies (with ZPE correction) are given in kcal/mol.

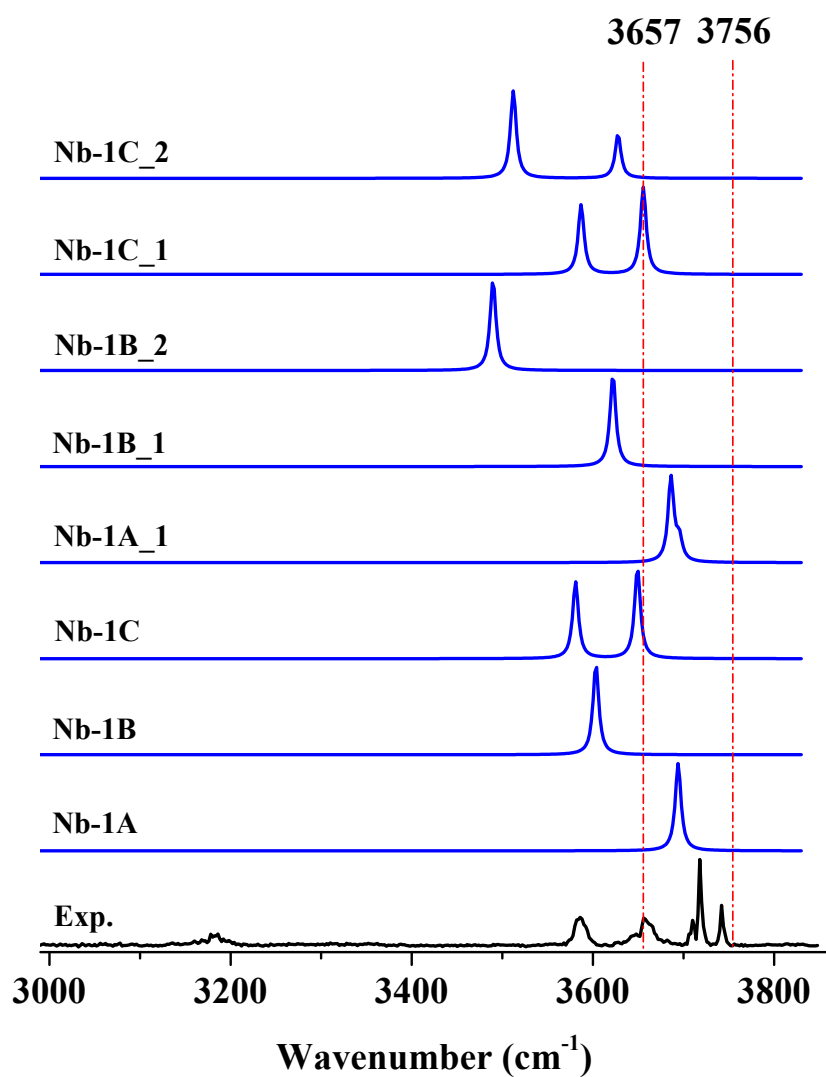

**Fig. S18.** Experimental infrared spectrum (black) and simulated vibrational spectra (blue) of  $\text{NbO}(\text{H}_2\text{O})\text{Ar}^+$  in O-H stretching frequency region. The two dashed red lines are corresponding to the symmetric ( $3657\text{cm}^{-1}$ ) and the asymmetric ( $3756\text{ cm}^{-1}$ ) stretches of the isolated water molecule.

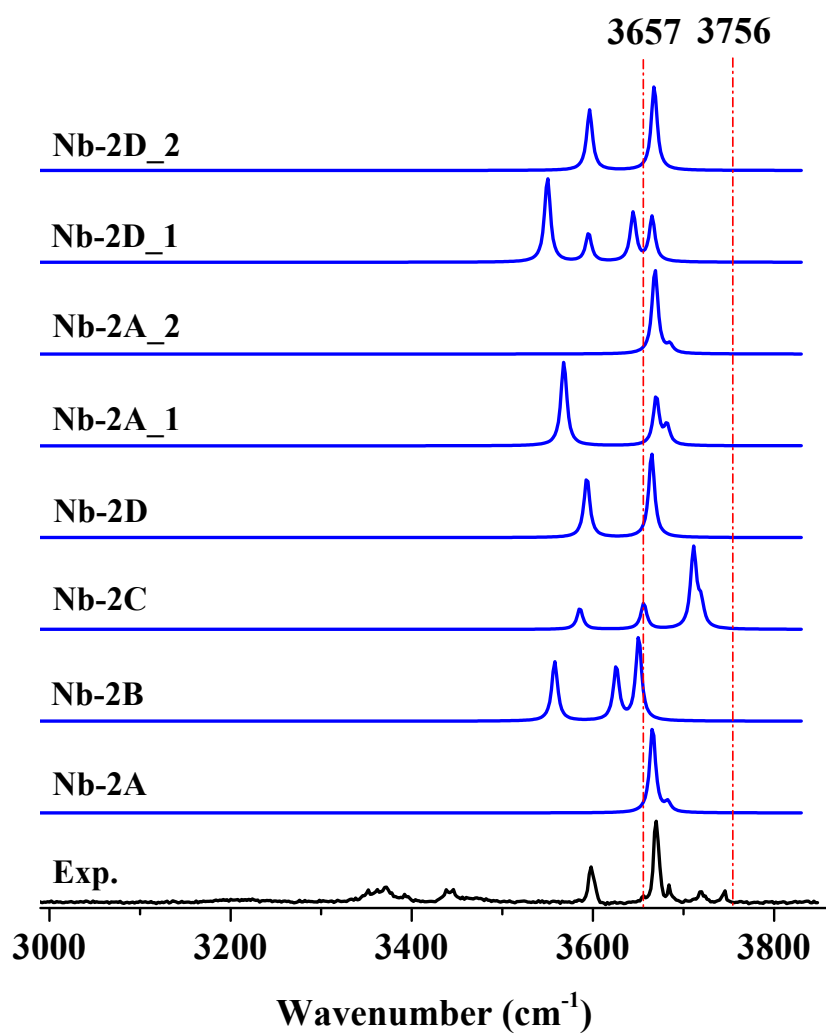

**Fig. S19.** Experimental infrared spectrum (black) and simulated vibrational spectra (blue) of  $\text{NbO}(\text{H}_2\text{O})_2\text{Ar}^+$  in O-H stretching frequency region. The two dashed red lines are corresponding to the symmetric ( $3657\text{cm}^{-1}$ ) and asymmetric ( $3756\text{ cm}^{-1}$ ) stretches of the isolated water molecule.

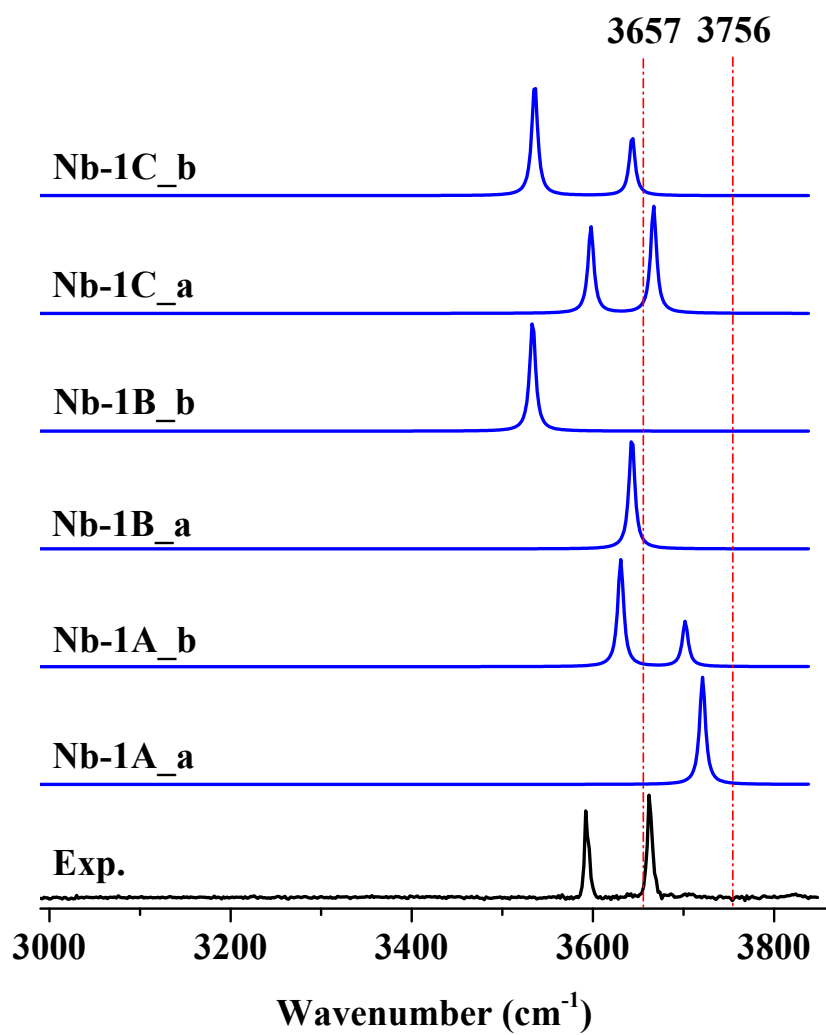

**Fig. S20.** Experimental infrared spectrum (black) and simulated vibrational spectra (blue) of  $\text{NbO}(\text{H}_2\text{O})\text{Ar}_2^+$  in O-H stretching frequency region. The two dashed red lines are corresponding to the symmetric ( $3657\text{cm}^{-1}$ ) and asymmetric ( $3756\text{ cm}^{-1}$ ) stretches of the isolated water molecule.

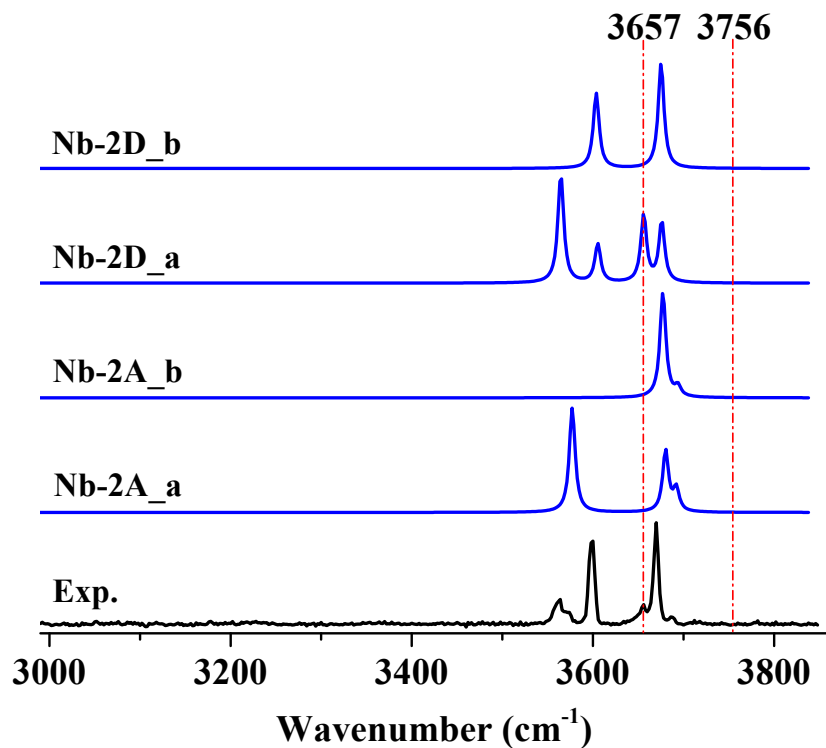

**Fig. S21.** Experimental infrared spectrum (black) and simulated vibrational spectra (blue) of  $\text{NbO}(\text{H}_2\text{O})_2\text{Ar}_2^+$  in O-H stretching frequency region. The two dashed red lines are corresponding to the symmetric ( $3657\text{cm}^{-1}$ ) and asymmetric ( $3756\text{ cm}^{-1}$ ) stretches of the isolated water molecule.

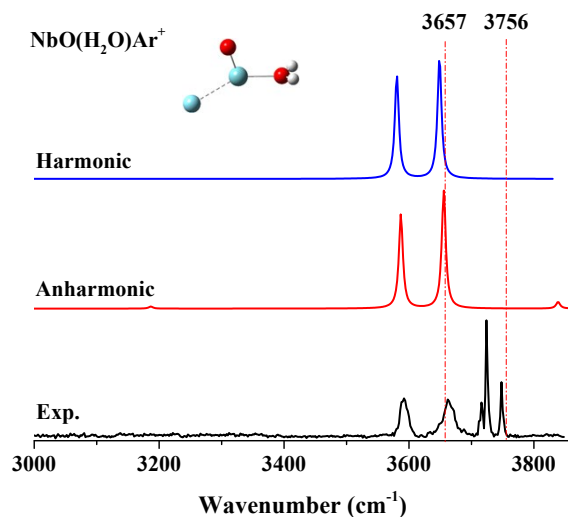

**Fig. S22.** Experimental infrared spectrum (black) of  $\text{NbO}(\text{H}_2\text{O})\text{Ar}^+$ , calculated anharmonic vibrational spectrum (red) and harmonic vibrational spectrum (blue) of Nb-1C\_1 in O-H stretching frequency region. The two dashed red lines are corresponding to the symmetric ( $3657\text{cm}^{-1}$ ) and asymmetric ( $3756\text{ cm}^{-1}$ ) stretches of the isolated water molecule.

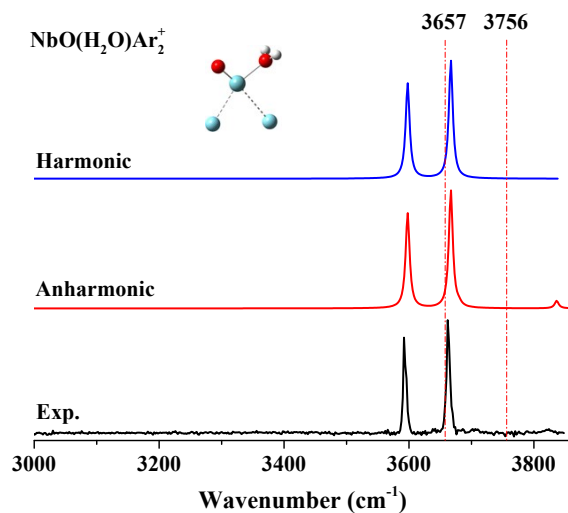

**Fig. S23.** Experimental infrared spectrum (black) of  $\text{NbO}(\text{H}_2\text{O})\text{Ar}_2^+$ , calculated anharmonic vibrational spectrum (red) and harmonic vibrational spectrum (blue) of Nb-1C\_a in O-H stretching frequency region. The two dashed red lines are corresponding to the symmetric ( $3657\text{ cm}^{-1}$ ) and asymmetric ( $3756\text{ cm}^{-1}$ ) stretches of the isolated water molecule.

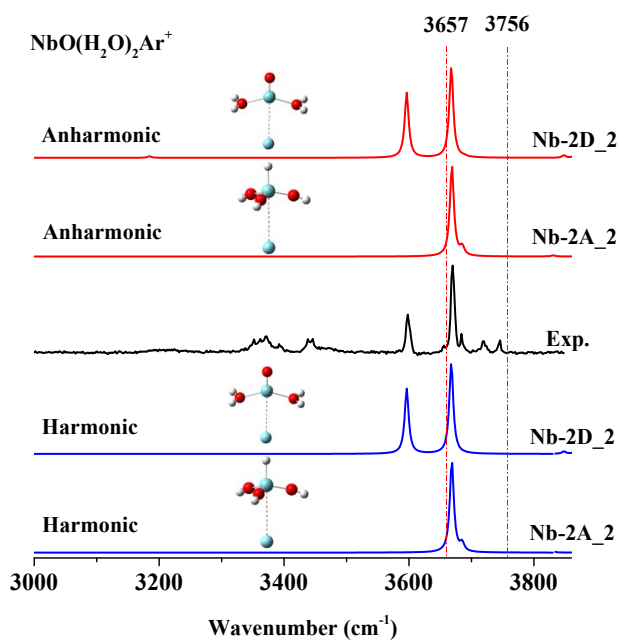

**Fig. S24.** Experimental infrared spectrum (black) of  $\text{NbO}(\text{H}_2\text{O})_2\text{Ar}^+$ , calculated anharmonic vibrational spectrum (red) and harmonic vibrational spectrum (blue) of Nb-2A\_2 and Nb-2D\_2 in O-H stretching frequency region. The two dashed red lines are corresponding to the symmetric ( $3657\text{ cm}^{-1}$ ) and asymmetric ( $3756\text{ cm}^{-1}$ ) stretches of the isolated water molecule.

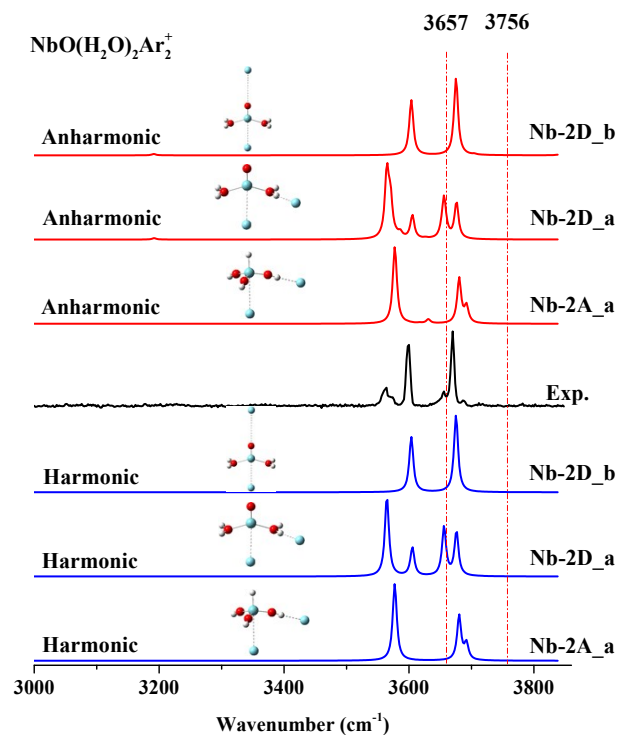

**Fig. S25.** Experimental infrared spectrum (black) of  $\text{NbO}(\text{H}_2\text{O})_2\text{Ar}_2^+$ , calculated anharmonic vibrational spectrum (red) and harmonic vibrational spectrum (blue) of Nb-2A\_a, Nb-2D\_a and Nb-2D\_b in O-H stretching frequency region. The two dashed red lines are corresponding to the symmetric (3657 $\text{cm}^{-1}$ ) and asymmetric (3756  $\text{cm}^{-1}$ ) stretches of the isolated water molecule.

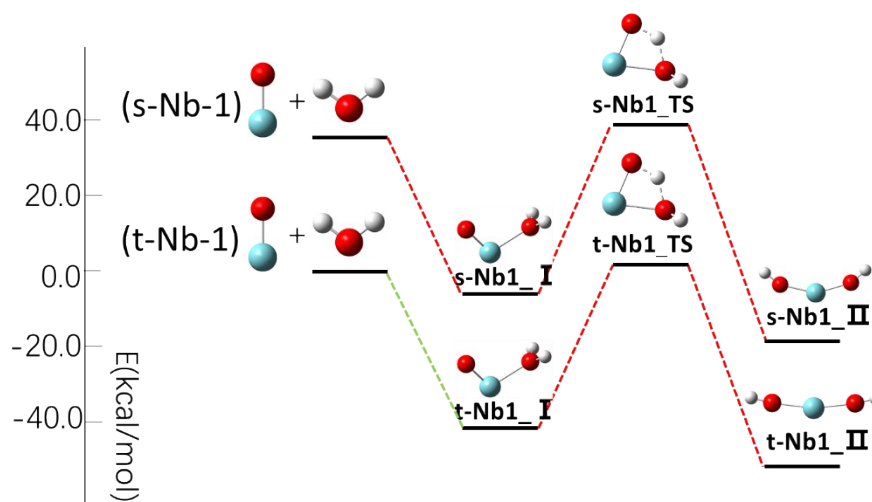

**Fig. S26.** Potential energy surfaces for the reactions of  $\text{NbO}^+ + \text{H}_2\text{O} \rightarrow \text{NbO}(\text{H}_2\text{O})^+$  (s-Nb-1: Singlet State; t-Nb-1: Triplet State).

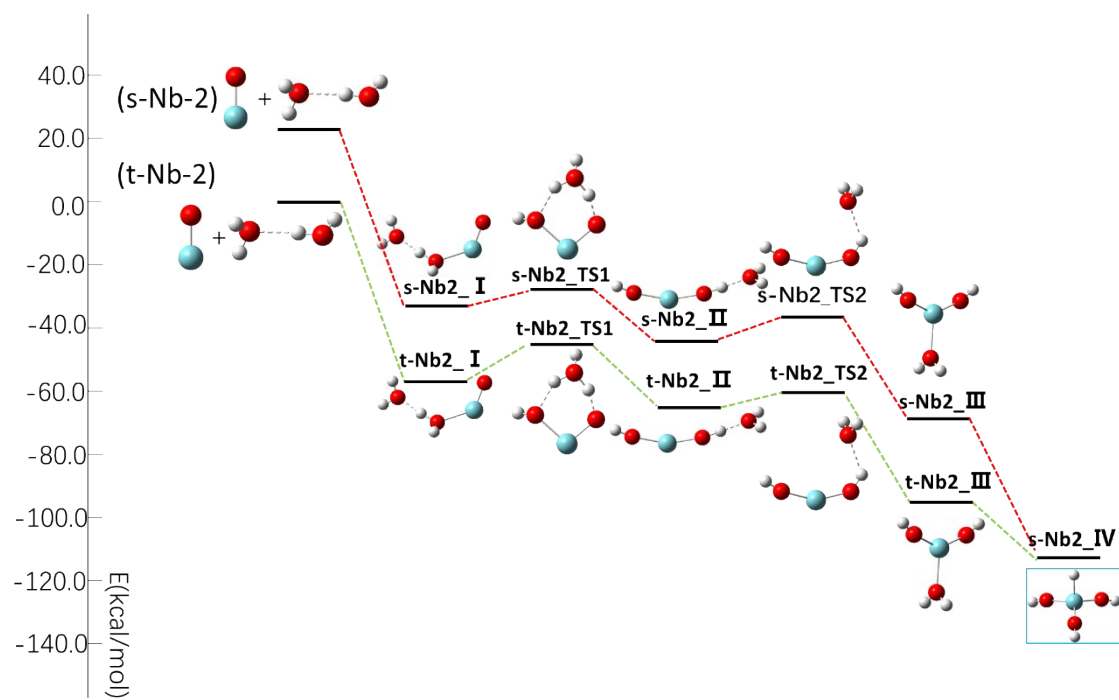

**Fig. S27.** Potential energy surfaces for the reactions of  $\text{NbO}^+ + 2\text{H}_2\text{O} \rightarrow \text{HNb}(\text{OH})_3^+$  (s-Nb-2: Singlet State; t-Nb-2: Triplet State).
